# Supplementary material for: Superoxide dismutase SOD-1 modulates C. elegans pathogen avoidance behavior
Source: PubMed Central journal article supplement (PMC5359715; doi:10.1038/srep45128), 2017-03-21
Supplement: srep45128-s1.pdf [file srep45128-s1.pdf]

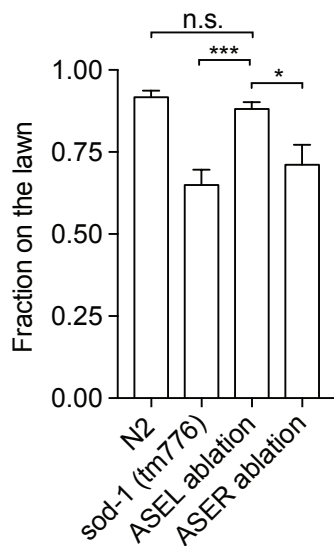

**Supplementary Figure 1. Ablation of ASEL neuron does not trigger heightened behavioral response to *P. aeruginosa*.**

*P. aeruginosa* lawn occupancy of *C. elegans* strains assayed at t = 5h. \*\*\* represents  $p < 0.001$ , \* represents  $p < 0.05$ , n.s. not significant, as determined by one-way ANOVA, followed by Tukey's multiple comparison test.  $N=9-12$ . Error bars represent standard error of the mean.

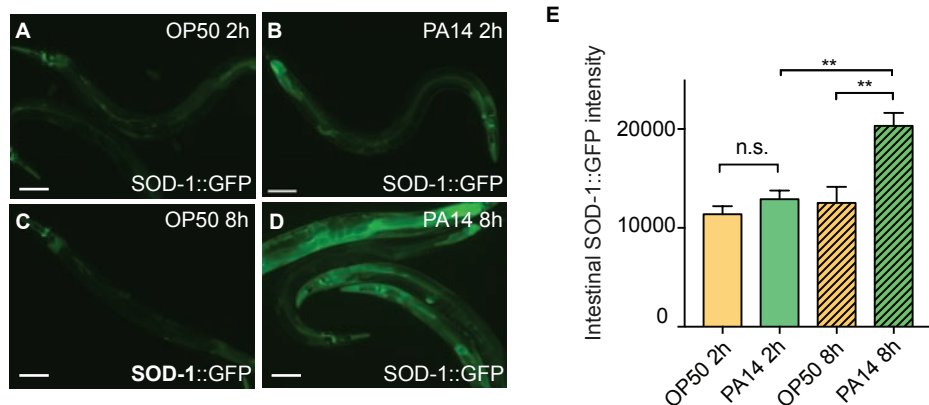

**Supplementary Figure 2. SOD-1 is induced in the intestine after extended exposure to *P. aeruginosa*.**

(A-D) Fluorescence micrographs of intestinal SOD-1::GFP. *sod-1(tm776); bosIs2 [sod-1p::sod-1 cDNA::GFP]* is exposed to *E. coli* OP50 or to *P. aeruginosa* PA14. Scale bar indicates 50  $\mu$ m.

(E) Average fluorescence intensity of SOD-1::GFP in the intestine. \*\* represents  $p < 0.01$ , n.s. not significant, as determined by one-way ANOVA, followed by Tukey's multiple comparison test.  $N=18-20$ . Error bars represent s.e.m.

Sup. Fig. 3

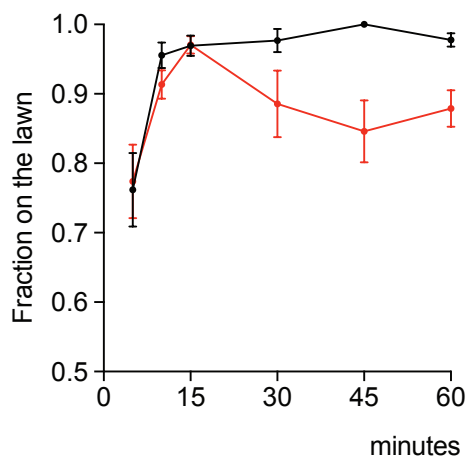

**Supplementary Figure 3. *P. aeruginosa* lawn occupancy of N2 and *sod-1(tm776)***

Time course of the *P. aeruginosa* lawn occupancy. Black indicates wild-type N2 strain; red indicates *sod-1(tm776)* mutant strain.  $N=12$ . Error bars represent standard error of the mean.

Superoxide dismutase SOD-1 modulates *C. elegans* pathogen avoidance behavior

Horspool AM. and Chang HC.

Sup. Fig. 4

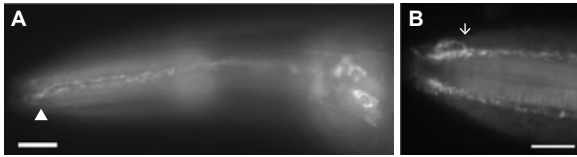

**Supplementary Figure 4. *che-3(ok1574)* mutant elicits abnormal ASER cilium structure.**

(A-B) Fluorescence micrographs of *bosIs2 [sod-1p::sod-1 cDNA::GFP]; che-3(ok1574)*. Looping (triangle) and branching (arrow) of the ASER cilium is shown. Scale bar indicates 10  $\mu\text{m}$  in (A) and 5  $\mu\text{m}$  in (B).
